# Supplementary material
Source: publisher site journal article supplement (https://www.dovepress.com/article/424879)
Supplement: Supplementary file 1 [file get_supplementary_file.php]

Supplemental Table 1: Blood count analysis and CRP measurement prior to LVAD implantation in patients suffering from infection within the first 3 months following LVAD implantation and infection-free patients.

|  | infection group  (n = 23) | non-infection group  (n = 31) | p value |
| --- | --- | --- | --- |
| RBCC [Tpt/L] | 3.7 ± 0.7 | 3.9 ± 0.7 | 0.19 |
| hematocrit | 0.33 ± 0.06 | 0.33 ± 0.06 | 0.39 |
| hemoglobin [mmol/L] | 6.9 ± 1.3 | 7.0 ± 1.2 | 0.40 |
| platelets [Gpt/L] | 231 ± 87 | 220 ± 97 | 0.33 |
| leukocytes [Gpt/L] | 8.2 ± 3.4 | 8.2 ± 3.2 | 0.50 |
| lymphocytes [Gpt/L] | 1.13 ± 0.57 | 1.50 ± 0.68 | 0.02 |
| neutrophils [Gpt/L] | 6.60 ± 3.35 | 5.61 ± 2.93 | 0.13 |
| NLR | 8.34 ± 7.52 | 5.27 ± 6.24 | 0.12 |
| CRP [mg/L] | 20.2 ± 21.9 | 23.6 ± 35.2 | 0.34 |

Footnote Supplemental Table 1: CRP, c-reactive protein; NLR, neutrophil-lymphocyte ratio; RBCC, red blood cell count
